# Supplementary material for: The Link between ADHD and Antisocial Behavior: The Moderating Role of the Protective Factor Sense of Coherence
Source: Preprints.org preprint supplement (doi:10.20944/preprints202209.0110.v1), 2022-09-07
Supplement: Supplementary file 3 [file supplementary]

***Supplementary:***

*Table S1- Nonparametric Correlations between demographic characteristics, ADHD, antisocial behavior types and coherence.*

|  | **Age** | **Gender** | **Religiosity** | **Emotional symptoms** |
| --- | --- | --- | --- | --- |
| **ADHD** | -.131** | .018 | -.138** | .348** |
| **Severe physical antisocial behavior** | -.222** | -.102** | -.061** | .083** |
| **Mild physical antisocial behavior** | -.248** | -.102** | -.032 | .122** |
| **Verbal antisocial behavior** | -.260** | -.091** | -.146** | .170** |
| **Property crimes** | -.176** | -.098** | -.122** | .111** |
| **Public order crimes** | -.251** | -.058** | -.178** | .107** |
| **Drug use** | -.002 | -.288** | -.208** | .014 |
| **Coherence** | .214** | -.101** | .259** | -.620** |

**. Correlation is significant at the 0.01 level (2-tailed).
